# 1 **Discovery of a Gut Bacterial Metabolic Pathway that Drives $\alpha$ -Synuclein Aggregation and** 2 **Neurodegeneration**

3

4 Lizett Ortiz de Ora<sup>1</sup>, Kylie S. Uyeda<sup>1</sup>, Elizabeth Bess<sup>1,2\*</sup>

5

6 <sup>1</sup>Department of Chemistry, University of California, Irvine, California, USA

7 <sup>2</sup>Department of Molecular Biology and Biochemistry, University of California, Irvine, California, USA

8

9 \*Corresponding author: Elizabeth N. Bess, Departments of Chemistry and Molecular Biology &

10 Biochemistry, University of California, Irvine, 1102 Natural Sciences II, Irvine, CA 92617, USA. E-mail:

11 [elizabeth.bess@uci.edu](mailto:elizabeth.bess@uci.edu).

12

## 13 **Abstract (250 words)**

14 Parkinson's disease (PD) etiology is associated with aggregation and accumulation of  $\alpha$ -synuclein ( $\alpha$ -  
15 syn) proteins in midbrain dopaminergic neurons. Emerging evidence suggests that in certain subtypes of  
16 PD,  $\alpha$ -syn aggregates originate in the gut and subsequently spread to the brain. However, the  
17 mechanisms that instigate  $\alpha$ -syn aggregation in the gut have remained elusive. In the brain, the  
18 aggregation of  $\alpha$ -syn is induced by oxidized dopamine. Such a mechanism has not been explored in the  
19 gastrointestinal (GI) tract, a niche harboring 46% of the body's dopamine reservoirs. Here, we report that  
20 gut bacteria *Enterobacteriaceae* induce  $\alpha$ -syn aggregation. More specifically, our *in vitro* data indicate  
21 that respiration of nitrate by *Escherichia coli* K-12 yields nitrite, a potent oxidizing agent that creates an  
22 oxidizing redox potential in the bacterial environment. In these conditions,  $\text{Fe}^{2+}$  was oxidized to  $\text{Fe}^{3+}$ ,  
23 enabling formation of dopamine-derived quinones and  $\alpha$ -syn aggregates. Exposing nitrite, but not nitrate,  
24 to enteroendocrine STC-1 cells induced aggregation of  $\alpha$ -syn that is natively expressed in these cells,  
25 which line the intestinal tract. Finally, we examined the *in vivo* relevance of bacterial nitrate respiration to  
26 the formation of  $\alpha$ -syn aggregates using *Caenorhabditis elegans* models of PD. We discovered that  
27 nematodes exposed to nitrate-reducing *E. coli* K-12 displayed significantly enhanced neurodegeneration

28 as compared to an *E. coli* K-12 mutant that could not respire nitrate. This neurodegenerative effect was  
29 absent when  $\alpha$ -syn was mutated to prevent interactions with dopamine-derived quinones. Taken  
30 together, our findings indicate that gut bacterial nitrate reduction may be critical to initiating intestinal  $\alpha$ -  
31 syn aggregation.

32

33

34 **Table of Contents Graphic:**

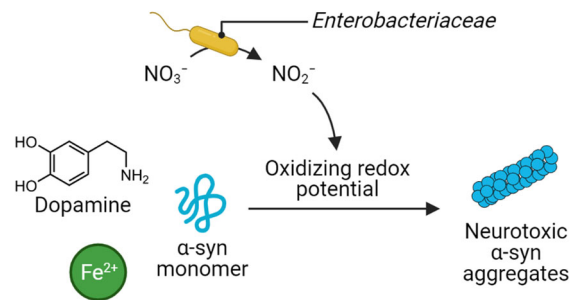

35

36

37

38

39

40

41

42

43

44

45

46

47

48

49

## 50 INTRODUCTION

51 Although Parkinson's disease (PD) has long been thought to originate in the brain, accumulating  
52 evidence indicates that some PD subtypes originate in the gastrointestinal (GI) tract.<sup>1,2</sup> PD is  
53 characterized by motor impairment that arises when  $\alpha$ -synuclein ( $\alpha$ -syn) protein aggregates accumulate  
54 in dopaminergic neurons of the substantia nigra, the brain site of motor control;<sup>3</sup> however,  $\alpha$ -syn  
55 expression is not limited to the brain.  $\alpha$ -syn is also expressed within the mucosa of the intestinal wall by  
56 enteroendocrine cells (EECs)<sup>4</sup> as well as by enteric neurons that innervate the GI tract.<sup>5</sup> At least eight  
57 years prior to onset of motor symptoms in people with idiopathic PD,  $\alpha$ -syn aggregates accumulate in GI  
58 tissue.<sup>6</sup> These protein aggregates may subsequently propagate, putatively in a prion-like fashion, from  
59 the intestine to the brain via the vagus nerve that connects these organs.<sup>7,8</sup> While there is evidence that  
60 intestinal  $\alpha$ -syn aggregates foreshadow neurodegeneration in the brain, the molecular-level mechanisms  
61 responsible for intestinal  $\alpha$ -syn aggregation have remained poorly understood.

62 Several lines of evidence suggest a microbial component in the development of  $\alpha$ -syn aggregates  
63 and progression of PD. The gut microbiota is distinct in people with PD as compared to non-diseased  
64 controls.<sup>9-13</sup> This dysbiosis is often characterized by an enrichment of the facultative anaerobic  
65 *Enterobacteriaceae* bacterial family whose abundance in the gut positively correlates with the severity of  
66 motor dysfunction in people with PD.<sup>9,14-16</sup> Although it remains controversial whether gut microbiota  
67 dysbiosis is a cause or a consequence of PD pathogenesis, studies using mouse models implicate the  
68 gut microbiome in the etiology of this disorder. In germ-free mice overexpressing  $\alpha$ -syn, GI-tract  
69 colonization using fecal samples from people with PD exacerbated motor deficits and brain pathology as  
70 compared to colonization using fecal samples from non-diseased controls.<sup>17</sup> Additionally, induction of  
71 intestinal inflammation that is commonly associated with blooms in *Enterobacteriaceae* (DSS-induced  
72 colitis)<sup>18,19</sup> resulted in accumulation of  $\alpha$ -syn in GI tracts followed by the pathogenic buildup of this protein  
73 in the brains of  $\alpha$ -syn-overexpressing mice.<sup>20,21</sup>

74 To identify specific gut bacterial biochemical processes that induce  $\alpha$ -syn aggregation in the GI  
75 tract, we sought clues in characterized mechanisms of  $\alpha$ -syn aggregation in the brain. In brain  
76 dopaminergic neurons, iron and dopamine can form a toxic pair that leads to aggregation of neural  $\alpha$ -syn

77 (Figure 1). Aging-related accumulation of iron in dopaminergic neurons causes oxidative stress that  
78 results in labile cytosolic ferrous iron ( $\text{Fe}^{2+}$ ) being oxidized to ferric iron ( $\text{Fe}^{3+}$ ).<sup>22</sup> Cytoplasmic dopamine  
79 that is abundant in dopaminergic neurons can be readily oxidized by  $\text{Fe}^{3+}$  to highly reactive *ortho*-  
80 quinones.<sup>23</sup> Dopamine-derived quinones interact with neural  $\alpha$ -syn to cause misfolding that results in  
81 toxic  $\alpha$ -syn oligomers.<sup>24</sup>

82 Like in the brain, the GI tract harbors dopamine and iron as well as expresses  $\alpha$ -syn. Of the body's  
83 dopamine pool, 46% is contained in the GI tract,<sup>25</sup> and the gut microbiota is responsible for elevating the  
84 dopamine concentration in intestinal tissue.<sup>26</sup> Iron, which can mediate dopamine oxidation, is present in  
85 high concentrations in the intestinal lumen (up to 25 mM), and increased dietary iron increases iron levels  
86 in intestinal cells.<sup>27</sup> Although the oxidation state of labile cytosolic iron is predominantly  $\text{Fe}^{2+}$  in the non-  
87 diseased GI tract,<sup>28</sup> conditions of oxidative stress increase the concentration of  $\text{Fe}^{3+}$ , which could oxidize  
88 dopamine as depicted in Figure 1. With the convergence of concentrated dopamine and iron in the  
89 intestinal epithelium as well as the expression of  $\alpha$ -syn by intestinal EECs and enteric neurons,  $\alpha$ -syn  
90 aggregation is poised to occur in the GI tract. We sought to identify gut bacterial biochemical processes  
91 that supply the oxidant capable of inducing iron-mediated dopamine oxidation and subsequent  $\alpha$ -syn  
92 aggregation.

93 Although changes in redox potential that induce oxidative stress in the GI tract are typically  
94 associated with host metabolic processes,<sup>29–33</sup> gut bacteria also modulate the redox potential of their  
95 environment.<sup>34</sup> Here, we describe that the ability of *Escherichia coli* (a prototypic gut bacterium of the  
96 *Enterobacteriaceae* bacterial family<sup>18</sup>) to create an environment with an oxidizing redox potential is a  
97 stimulus that provokes iron and dopamine to cause  $\alpha$ -syn aggregation. We identify that nitrite, which is  
98 an oxidant generated during *Enterobacteriaceae* nitrate dissimilatory metabolism,<sup>18,35,36</sup> stimulates a  
99 cascade of oxidation reactions that results in  $\alpha$ -syn aggregation and neurodegeneration. Our results from  
100 *in vitro* experiments with both bacterial cultures and  $\alpha$ -syn-expressing intestinal epithelial cells as well as  
101 *in vivo* experiments using a *Caenorhabditis elegans* model of PD suggest a novel molecular mechanism  
102 by which the gut microbiota may influence PD pathogenesis.

103

## 104 RESULTS

### 105 *E. coli* nitrate respiration creates an environment of oxidizing redox potential.

106 Given the positive correlation between PD severity and the abundance of *Enterobacteriaceae* in  
107 the gut microbiotas of people with PD,<sup>9</sup> we sought to determine whether metabolic capabilities of this  
108 bacterial family are implicated in the pathogenic aggregation of  $\alpha$ -syn. We were particularly intrigued by  
109 *Enterobacteriaceae*'s ability to perform anaerobic nitrate respiration, which results in production of an  
110 oxidant, nitrite.<sup>18,37,38</sup> We hypothesized that an oxidizing redox potential would be created by nitrate-  
111 respiring *Enterobacteriaceae* and, thereby, stimulate shifts in the relative abundance of labile iron from  
112 being mainly  $\text{Fe}^{2+}$  (which putatively predominates in the reducing conditions of the gut microbiota<sup>39</sup>) to  
113  $\text{Fe}^{3+}$  (which could subsequently oxidize dopamine and induce  $\alpha$ -syn misfolding and aggregation).

114 To test our hypothesis, we anaerobically cultured *Escherichia coli* K-12 to enable two types of  
115 metabolism: fermentation and respiration. Fermentation conditions were created by culturing *E. coli* K-  
116 12 in a minimal-nutrient medium supplemented with  $\text{Fe}^{2+}$  (500  $\mu\text{M}$ ) as well as glucose (20 mM) as the  
117 sole carbon source but without nitrate (media referred to as mM9- $\text{NO}_3$ ). Conditions for nitrate respiration  
118 were generated by supplementing the same medium with nitrate (50 mM; media referred to as mM9+ $\text{NO}_3$ ).  
119 As shown in Figure 2a, supplementation with nitrate afforded a 1.6-fold increase in bacterial growth after  
120 12 hours of incubation as measured by optical density of cultures at 600 nm ( $\text{OD}_{600}$ ). These findings are  
121 consistent with reported *in vivo* findings: due to nitrate respiration being more energetically lucrative than  
122 fermentative metabolism,<sup>40</sup> a higher concentration of intestinal nitrate enables a bloom in  
123 *Enterobacteriaceae* abundance in the gut microbiota.<sup>18</sup>

124 In *E. coli* K-12 cultures, we also evaluated fluctuations in redox potential as a function of bacterial  
125 metabolism. A reducing redox potential (relative to sterile controls) was observed when bacteria was  
126 cultured in mM9- $\text{NO}_3$  (Figure 2b). The progressively more reducing redox potential observed over the  
127 course of exponential bacterial growth is characteristic of fermentative metabolism that yields hydrogen,  
128 a reducing agent.<sup>41</sup> In contrast, bacteria cultured in mM9+ $\text{NO}_3$  demonstrated a steadily increasing oxidizing  
129 redox potential (relative to sterile controls) over 18 hours of incubation, reaching a maximum value of  
130  $308.17 \pm 7.62$  mV (Figure 2b). Notably, increases in oxidative redox potential mirrored accumulation of

131 nitrite in culture media (Figure 2c). Further supporting nitrite's role as a redox-active metabolite, we  
132 observed that supplementation of sodium nitrite to sterile mM9 medium (mM9<sub>+NO2</sub>) afforded increases in  
133 redox potential in a concentration dependent manner (Figure S1). In contrast, uninoculated sterile media  
134 supplemented with sodium nitrate (mM9<sub>+NO3</sub>) showed no significant variation in the redox potential of the  
135 solution. These findings support the notion that bacterial nitrate respiration can shift the redox potential  
136 of the environment to being more oxidizing through the production of nitrite.

137 We next assessed whether the oxidizing redox potential afforded by nitrate-respiring conditions  
138 could shift the balance of iron speciation from favoring Fe<sup>2+</sup> to favoring Fe<sup>3+</sup>. *E. coli* K-12 was cultured in  
139 mM9<sub>-NO3</sub> or mM9<sub>+NO3</sub> media, and the relative abundance of Fe<sup>2+</sup> and Fe<sup>3+</sup> was measured using the  
140 ferrozine assay.<sup>42</sup> Under fermentation conditions that afforded a reducing redox potential (mM9<sub>-NO3</sub>), Fe<sup>2+</sup>  
141 was the predominant iron species (Figure 2d). Conversely, in culture conditions for bacterial nitrate  
142 respiration (mM9<sub>+NO3</sub>), the oxidizing redox potential that corresponded to production of nitrite drove iron  
143 oxidation such that Fe<sup>3+</sup> became the dominant oxidation state of iron (Figure 2e). Taken together, these  
144 findings demonstrate that the presence of nitrate enhances *E. coli* K-12 growth as well as creates an  
145 oxidizing redox potential that corresponds to nitrite production and that results in the predominance of  
146 Fe<sup>3+</sup> over Fe<sup>2+</sup> in culture media.

147

#### 148 ***E. coli* nitrate respiration initiates a cascade of oxidation reactions that lead to $\alpha$ -syn aggregation.**

149 Next, we sought to determine whether bacterial nitrate respiration could incite the cascade of  
150 oxidation reactions that are implicated in dopamine-dependent  $\alpha$ -syn aggregation in cerebral  
151 dopaminergic neurons but that remain unexplored in the GI tract: Fe<sup>3+</sup>-mediated dopamine oxidation that  
152 forms *ortho*-quinones<sup>43-45</sup> that cause  $\alpha$ -syn to misfold and, subsequently, aggregate.<sup>23,24</sup> To this end, we  
153 again anaerobically cultured *E. coli* K-12 until stationary phase (14 hours) in either mM9<sub>+NO3</sub> or mM9<sub>-NO3</sub>  
154 but with the addition of  $\alpha$ -syn monomer (20  $\mu$ M) as well as dopamine (500  $\mu$ M; mM9<sub>+NO3,+DA</sub> or  
155 mM9<sub>-NO3,+DA</sub>, respectively) or its vehicle (mM9<sub>+NO3,-DA</sub> or mM9<sub>-NO3,-DA</sub>, respectively). As before, bacteria  
156 cultured in nitrate-respiring conditions reduced nitrate to nitrite (Figure 3a). Accumulation of nitrite  
157 corresponded to an oxidizing redox potential (Figure 3b) and a shift in iron speciation so that the relative

158 abundance of  $\text{Fe}^{3+}$  increased in comparison to cultures without nitrate supplementation (Figure 3c).  
159 Culture conditions in which nitrite was produced and dopamine was also present resulted in lower relative  
160 abundance of  $\text{Fe}^{3+}$  as compared to conditions without dopamine. This finding is putatively a reflection of  
161 dopamine oxidation being coupled to reduction of  $\text{Fe}^{3+}$ , thereby increasing the relative abundance of  $\text{Fe}^{2+}$ .  
162 Correspondingly, we were not able to measure redox potential in culture conditions that contained  
163 dopamine, as redox potential did not stabilize under these conditions.

164 In cultures containing dopamine, we observed formation of a dark pigment, which is characteristic  
165 of quinones (Figure 3d).<sup>46</sup> Redox-cycling stain nitroblue tetrazolium (NBT), which specifically stains  
166 quinones,<sup>47</sup> enabled detection of quinones in dot blots of nitrate-reducing bacterial cultures (Figure 3e  
167 and Figure S2). Contrastingly, and as depicted in Figure 3d, no dark pigment was observed in dopamine-  
168 supplemented fermentative culture conditions ( $\text{mM9}_{-\text{NO}_3,+\text{DA}}$ ) wherein  $\text{Fe}^{3+}$  relative abundance was  
169 significantly less than in respiration culture conditions ( $\text{mM9}_{+\text{NO}_3,+\text{DA}}$ ); correspondingly, no quinones were  
170 detected by NBT stain (Figure 3e; positive control shown in Figure S2). In the absence of dopamine  
171 supplementation to culture media, quinones were neither detected in nitrate-reducing nor in fermenting  
172 bacterial cultures. These data indicate that dopamine supplementation is necessary for quinone formation  
173 and that dopamine-dependent quinone formation occurs in the oxidizing conditions created upon  
174 bacterial reduction of nitrate.

175 Strikingly, dopamine-dependent quinone formation coincided with  $\alpha$ -syn aggregation. Evaluation  
176 of  $\alpha$ -syn aggregation was conducted by dot blot, immunostaining  $\alpha$ -syn aggregates on membranes  
177 spotted with culture media (Figure 3f; positive control shown in Figure S3). Significantly greater amounts  
178 of  $\alpha$ -syn aggregates formed in nitrate-reducing conditions as compared to fermentative conditions—but  
179 only when dopamine was present (Figure 3g and Figure S3). In the absence of dopamine, a culture  
180 environment of oxidizing redox potential ( $\text{mM9}_{+\text{NO}_3,-\text{DA}}$ ; Figure 3b) was not sufficient to induce  $\alpha$ -syn  
181 aggregation (Figure 3g and Figure S3).

182 We next used a genetic knockout of nitrate respiration to further clarify the roles of nitrate and  
183 nitrite in initiating  $\alpha$ -syn aggregation. First, we targeted a molybdenum cofactor (MoaA) that is  
184 incorporated in the active site of nitrate reductases and is essential for this enzyme to reduce nitrate to

185 nitrite.<sup>48</sup> *MoaA* was deleted from *E. coli* K-12 wild-type to create the isogenic mutant *E. coli* K-12  $\Delta moaA$ .  
186 Culturing *E. coli* K-12  $\Delta moaA$  in mM9<sub>+NO<sub>3</sub></sub> media did not afford the growth advantage that was obtained  
187 when, upon culturing in the same media, *E. coli* K-12 wild-type performed nitrate reduction (Figure S4).  
188 Moreover, *E. coli* K-12  $\Delta moaA$  did not produce redox-active nitrite (Figure 3a), indicating that nitrate  
189 reduction was, indeed, inhibited by genetic deletion of *moaA*; likewise, a significantly less oxidizing redox  
190 potential was observed as compared to cultures of the wild-type strain cultured in mM9<sub>+NO<sub>3</sub></sub> media (Figure  
191 3b). The less oxidizing redox potential of *E. coli* K-12  $\Delta moaA$  cultures corresponded to significant  
192 reductions in the relative abundance of Fe<sup>3+</sup> when *E. coli* K-12  $\Delta moaA$  was cultured in either mM9<sub>+NO<sub>3</sub>, -DA</sub>  
193 or mM9<sub>+NO<sub>3</sub>, +DA</sub> as compared to analogous cultures of *E. coli* K-12 wild-type (Figure 3c). Without the ability  
194 of *E. coli* K-12  $\Delta moaA$  to reduce nitrate and increase the oxidizing redox potential of the culture media,  
195 neither dopamine oxidation nor  $\alpha$ -syn aggregation occurred (Figures 3e, 3f, 3g; Figures S2 and S3).  
196 Taken together, these data indicate that the presence of nitrate, alone, does not induce  $\alpha$ -syn  
197 aggregation; instead, we have demonstrated that bacteria that produce nitrite can transform an innocuous  
198 trio—Fe<sup>2+</sup>, dopamine, and  $\alpha$ -syn monomers—into one that generates toxic  $\alpha$ -syn aggregates.

199

## 200 **Tungstate inhibits $\alpha$ -syn aggregation induced by bacterial nitrate reduction.**

201 After identifying the instigating role of bacterial reduction of nitrate to nitrite in  $\alpha$ -syn aggregation,  
202 we were curious about whether  $\alpha$ -syn aggregation could be mitigated by chemically inhibiting bacterial  
203 nitrate respiration. To this end, we turned to tungstate, a chemical analog of molybdate that renders  
204 *Enterobacteriaceae* nitrate reductases inactive.<sup>19</sup> We evaluated the effect of sodium tungstate (0.5–100  
205 mM) on *E. coli* K-12 (wild-type and  $\Delta moaA$ ) cultured until stationary phase (14 hours) in mM9<sub>+NO<sub>3</sub></sub> media  
206 supplemented with  $\alpha$ -syn monomer (20  $\mu$ M) and with or without dopamine (Figure S5). For *E. coli* K-12  
207 wild-type cultures, a dose-response relationship was observed: increasing concentrations of sodium  
208 tungstate resulted in decreasing production of nitrite (Figure 4a).

209 In accordance with our findings that bacterial reduction of nitrate to nitrite creates a more oxidizing  
210 redox potential, progressive inhibition of this process using increasing concentrations of sodium tungstate  
211 supplemented to cultures of *E. coli* K-12 wild-type (in the absence of dopamine) correlated with



212 decreasing oxidizing redox potentials of cultures (Figure 4b). As the redox potential of *E. coli* K-12 wild-  
213 type cultures decreased with increasing concentrations of tungstate, the relative abundance of Fe<sup>3+</sup> also  
214 decreased in cultures with dopamine (Figure 4c) and without dopamine (Figure 4d). Tungstate (0.5–50  
215 mM) inhibition of nitrate reduction by *E. coli* K-12 wild-type corresponded with decreased visible  
216 pigmentation of cultures (Figure 4e) and NBT-stained quinone (Figure 4f and Figure S2) as well as  
217 decreased formation of  $\alpha$ -syn aggregates (Figures 4g and 4h; Figure S3). Although increasing tungstate  
218 concentrations from 0.5 mM to 100 mM resulted in significantly decreased nitrite level, relative redox  
219 potential, Fe<sup>3+</sup> relative abundance, and  $\alpha$ -syn aggregation, supplying *E. coli* K-12 wild-type cultures with  
220 up to 100 mM of tungstate did not ameliorate the effects of nitrite reduction to the extent that was  
221 observed upon genetic deletion of *moaA*. With 100 mM tungstate, nitrite concentration, Fe<sup>3+</sup> relative  
222 abundance, and  $\alpha$ -syn aggregates remained significantly greater in cultures of *E. coli* K-12 wild-type as  
223 compared with *E. coli* K-12  $\Delta moaA$ . Taken together, these results indicate that tungstate is a means to  
224 chemically limit (but not fully prevent) generation of the oxidizing environment created by *E. coli* nitrate  
225 reduction and, thereby, inhibit the cascade of oxidation reactions that lead to  $\alpha$ -syn aggregation.

226

### 227 **Redox-active nitrite induces $\alpha$ -syn aggregation in specialized gut epithelial cells.**

228 We next set out to examine the relevance of our proposed bacteria-induced  $\alpha$ -syn aggregation  
229 mechanism to the mammalian gut. In the GI tract,  $\alpha$ -syn is expressed by specialized epithelial cells called  
230 enteroendocrine cells (EECs);<sup>4</sup> the dopamine metabolic pathway is also expressed by these cells.<sup>49</sup> EECs  
231 are chemosensory cells at the interface between gut luminal contents and the nervous system. While the  
232 apical side of these cells is in direct contact with the gut microbiome and its metabolites, a cellular  
233 projection (called a neuropod) on the basolateral surface of EECs forms synapses with enteric neurons,  
234 including those of the vagus nerve.<sup>50</sup> Thus, EECs have been proposed as a potential site where  
235 environmental factors, including bacterial metabolites, could initiate  $\alpha$ -syn misfolding and the prion-like  
236 cascade leading to PD.<sup>4,51</sup>

237 Owing to gut epithelial cells absorbing nitrite through passive diffusion,<sup>52</sup> we hypothesized that  
238 this redox-active metabolite that is produced in the gut lumen by nitrate-respiring bacteria<sup>18,19</sup> could

239 induce aggregation of  $\alpha$ -syn that is present in the cytoplasm of EECs.<sup>4</sup> To test our hypothesis, we used  
240 murine STC-1 cells, an accepted model cell line for elucidating properties of native EECs.<sup>53</sup> STC-1 cells  
241 were incubated with nitrate or nitrite (0.5–50 mM), and  $\alpha$ -syn aggregation was analyzed via  
242 immunofluorescent staining using an antibody for  $\alpha$ -syn fibrils (Figure 5a). STC-1 cells treated with 0.5  
243 mM nitrate as compared to untreated cells showed no significant difference in amounts of  $\alpha$ -syn  
244 aggregates (Figure 5b). In contrast, treatment with nitrite significantly induced  $\alpha$ -syn aggregation in a  
245 concentration dependent manner, with 0.5 mM, 5 mM, and 50 mM nitrite resulting in 5.0-, 9.3-, and 10.8-  
246 fold increases in aggregation, respectively, as compared to untreated cells (Figure 5b). Additionally, at  
247 each concentration tested, aggregation was significantly elevated in nitrite- versus nitrate-treated cells.  
248 Taken together, these results not only provide strong evidence for our proposed model that nitrite induces  
249  $\alpha$ -syn aggregation within intestinal cells expressing this protein, but these findings also emphasize the  
250 importance of bacterial reduction of nitrate to nitrite to incite this pathogenic process.

251

## 252 **Nitrate-reducing bacteria provoke increased dopaminergic neurodegeneration in *Caenorhabditis*** 253 ***elegans*.**

254 Having discovered that nitrate-reducing *E. coli* K-12 wild-type can initiate a cascade of reactions  
255 that results in  $\alpha$ -syn aggregation *in vitro*, we next examined whether gut bacteria could modulate  
256 dopamine-dependent  $\alpha$ -syn aggregation and neurodegeneration *in vivo*. For this investigation, we made  
257 use of the multiple features of *Caenorhabditis elegans* that position this organism as a valuable  
258 gnotobiotic model for discovery of molecular-level mechanisms governing the gut–brain axis.<sup>54</sup> In  
259 particular, we selected transgenic *C. elegans* models of PD that have been used to elucidate dopamine’s  
260 role in the formation of toxic  $\alpha$ -syn oligomers and in neurodegeneration.<sup>55,56</sup>

261 First, we used *C. elegans* strain UA287 in which the six frontal dopaminergic neurons in this  
262 animal both express human  $\alpha$ -syn A53T mutant and fluoresce by virtue of GFP, with expression of both  
263 proteins controlled by dopamine transporter promoter *P<sub>dat-1</sub>*.<sup>55</sup> Neurodegeneration in these nematodes is  
264 evidenced by decline of the fluorescent signal (indicating neuron death) as well as by changes in the  
265 morphology of neuritic processes and soma (indicating decline in neuronal activity).<sup>57,58</sup> Previous studies

266 using these animals have demonstrated that dopamine as well as oxidative damage that results from  
267 aging<sup>55</sup> or environmental factors<sup>59</sup> are mediators of  $\alpha$ -syn-dependent dopaminergic neurodegeneration;  
268 yet, the influence of host–microbe interactions on this pathogenic process has remained undetermined.

269 To address this knowledge gap, *C. elegans* UA287 (n=15 hermaphroditic nematodes from each  
270 of three independent transgenic worm lines) were reared with a food source of either *E. coli* K-12 wild-  
271 type or  $\Delta moaA$  aerobically cultured in mM9<sub>-NO<sub>3</sub></sub>, both conditions that provided a baseline for  
272 neurodegeneration in the absence of bacterial nitrate reduction (Figure S6). Then, *C. elegans* UA287  
273 synchronized L4 larvae (48 hours post-hatching) were exposed, in anaerobic conditions, to *E. coli* K-12  
274 wild-type or  $\Delta moaA$ , respectively, that had been anaerobically cultured in mM9<sub>-NO<sub>3</sub></sub>, mM9<sub>+NO<sub>3</sub></sub>, or mM9  
275 supplemented with nitrite (mM9<sub>+NO<sub>2</sub></sub>); after three hours, nematodes were returned to aerobic conditions,  
276 washed of bacterial treatments, and then resupplied with the respective food sources provided at baseline  
277 conditions. Following this acute exposure, neuronal decline was monitored using fluorescence  
278 microscopy every 48 hours until day 6 post-hatching, a time at which aging-independent  
279 neurodegeneration is typically observed.<sup>60</sup> Next, dopaminergic neurodegeneration was assessed as  
280 previously reported<sup>55,58,61</sup>: nematodes were scored as having a neurodegenerative phenotype if any  
281 degenerative processes (e.g., a missing dendritic process, cell body loss, or a blebbing neuronal process)  
282 were observed.

283 To assess the effect of hypoxia on neurodegeneration, one group of nematodes was maintained  
284 in aerobic conditions, reared on a food source of *E. coli* K-12 wild-type (aerobically cultured in mM9<sub>-NO<sub>3</sub></sub>),  
285 and not subjected to the acute bacterial exposure protocol (i.e., untreated controls). At days 4 and 6 post-  
286 hatching, 60±7% and 44±6%, respectively, of the untreated nematode population exhibited no  
287 dopaminergic neurodegeneration (Figures 6a and 6b). These observed rates of decline are consistent  
288 with previously reported rates of  $\alpha$ -syn-dependent neurodegeneration observed in this *C. elegans*  
289 strain.<sup>55</sup> Additionally, acute exposure of *C. elegans* UA287 to either *E. coli* K-12 wild-type or  $\Delta moaA$   
290 cultured in mM9<sub>-NO<sub>3</sub></sub> resulted in no significant differences in dopaminergic neurodegeneration as  
291 compared to untreated controls at day 4 or day 6 (Figures 6a and 6b). These data indicate that hypoxic  
292 conditions that nematodes were subjected to during the acute bacterial exposure protocol does not, itself,

293 exacerbate neurodegeneration nor does bacterial genetic background, in the absence of nitrate, impact  
294 baseline levels of neurodegeneration.

295 Neurodegeneration phenotypes significantly increased when *C. elegans* UA287 were acutely  
296 exposed to cultures of *E. coli* K-12 wild-type in mM9<sub>+NO<sub>3</sub></sub>. By day 4 post-hatching, only 36±2% of worms  
297 exhibited normal neurons (Figure 6a), which further dropped to 24±4% by day 6 (Figure 6b). Nitrate,  
298 alone, did not aggravate neurodegeneration in *C. elegans* UA287, as nematodes exposed to cultures of  
299 *E. coli* K-12  $\Delta moaA$  in mM9<sub>+NO<sub>3</sub></sub> displayed no significant difference in neurodegeneration as compared to  
300 untreated controls or to animals treated with *E. coli* K-12  $\Delta moaA$  cultured in mM9<sub>-NO<sub>3</sub></sub>. In contrast, treating  
301 nematodes with *E. coli* K-12 wild-type or  $\Delta moaA$  cultured with nitrite (mM9<sub>+NO<sub>2</sub></sub>) resulted in significant  
302 neurodegeneration, which did not differ from levels observed upon treatment with cultures of *E. coli* K-12  
303 wild-type in mM9<sub>+NO<sub>3</sub></sub>. As worms aged from day 4 to day 6, there were fewer worms without  
304 neurodegenerative phenotypes across every treatment group while the relative trends in  
305 neurodegeneration were maintained across both time points (Figures 6a and 6b). Taken together, these  
306 findings indicate that *C. elegans* UA287 exposed to nitrate-reducing *E. coli* K-12 does not merely induce  
307 dopaminergic neurodegeneration but also that a single acute exposure to the products of this bacterial  
308 metabolic pathway—nitrite—is enough to induce persistent and progressive neuronal decline.

309

310 **Interaction between dopamine and  $\alpha$ -syn are critical determinants of whether nitrate-reducing**  
311 **bacteria induce dopaminergic neurodegeneration in *C. elegans* model of PD.**

312 Owing to data from our *in vitro* experiments that showed the necessity of dopamine to  $\alpha$ -syn  
313 aggregation that was induced by bacterial nitrate reduction, we next sought to determine the significance  
314 of dopamine to this mechanism of neurodegeneration *in vivo*. To examine this mechanism, we used *C.*  
315 *elegans* strain UA288.<sup>62,63</sup> This strain has the same genetic background as strain UA287, except that a  
316 mutated version of  $\alpha$ -syn is encoded: five amino acids (residues 125–129) near the C-terminus of  $\alpha$ -syn  
317 were mutated from Y<sub>125</sub>EMPS<sub>129</sub> to F<sub>125</sub>AAFA<sub>129</sub> [mutant referred to as A53T(125-9m)]. These five  
318 mutations prevent the interaction between dopamine quinones and the C-terminus of  $\alpha$ -syn that leads to  
319  $\alpha$ -syn aggregate formation.<sup>62,63</sup>

320 When dopamine was prevented from interacting with  $\alpha$ -syn, bacterial culture conditions that  
321 induced dopamine-dependent quinone formation and  $\alpha$ -syn aggregation *in vitro* as well as  
322 neurodegenerative phenotypes in *C. elegans* UA287 had no impact on dopaminergic neurodegeneration  
323 in *C. elegans* UA288. Neither acute exposure of *C. elegans* UA288 to *E. coli* K-12 wild-type cultured in  
324 either mM9<sub>+NO<sub>3</sub></sub> or in mM9<sub>+NO<sub>2</sub></sub> nor *E. coli* K-12  $\Delta moaA$  cultured in mM9<sub>+NO<sub>2</sub></sub> had any impact on  
325 neurodegeneration as compared to untreated nematodes at either day 4 (Figure 6c) or day 6 (Figure 6d).  
326 Mirroring findings from our *in vitro* experiments, these data indicate that nitrite, alone, is not sufficient to  
327 induce a neurodegenerative phenotype. Instead, nitrite drives dopamine-dependent  $\alpha$ -syn aggregation  
328 as a mechanism of neurotoxicity in this *C. elegans* model of PD.

329

## 330 DISCUSSION

331 Here, we show that the ability of *Enterobacteriaceae*, specifically *E. coli*, to modulate the redox  
332 potential of a bacterium's environment plays a critical role in inducing the formation of  $\alpha$ -syn aggregates.  
333 Microbial metabolism has been previously demonstrated to influence the redox potential of the  
334 environment;<sup>34</sup> however, gut bacterial metabolic pathways are typically associated with creating more  
335 reducing environments, while the generation of oxidizing environments is commonly linked to host  
336 processes.<sup>29–33,64</sup> Our data suggest that bacteria performing nitrate dissimilatory metabolism can  
337 generate an oxidizing environment. When this metabolic process occurs, *Enterobacteriaceae* reduce  
338 nitrate, a relatively redox-inert by-product of the host inflammatory response,<sup>65</sup> to nitrite, an oxidizing  
339 agent.

340 Using *E. coli* K-12 wild-type cultures, we demonstrated that the presence of nitrate in the growth  
341 medium results in its reduction to nitrite as well as a generation of a redox environment that is more  
342 oxidizing as compared to the same cultures without nitrate. In contrast, nitrate supplied to bacteria with  
343 a nitrate respiration defect (i.e., *E. coli* K-12  $\Delta moaA$ ) or to sterile media neither resulted in nitrite  
344 production nor a more oxidizing redox potential. These data indicate that *E. coli* K-12 nitrate metabolism  
345 generates an oxidizing environment. Notably, we showed that the shift in redox potential that  
346 accompanies nitrite production was sufficient to alter the relative abundance of iron species so that Fe<sup>3+</sup>

347 predominated over Fe<sup>2+</sup> in cultures. This shift occurred in spite of anaerobic and reducing *in vitro* culture  
348 conditions similar to those of the GI tract that favor the prevalence of Fe<sup>2+</sup> over Fe<sup>3+</sup>.<sup>39</sup> *Enterobacteriaceae*  
349 nitrate respiration may be an underappreciated mechanism by which gut bacteria disrupt their  
350 environment's relative abundance of Fe<sup>2+</sup> and Fe<sup>3+</sup> as well as the metabolic processes mediated by this  
351 redox-active metal.

352 Iron has been implicated in PD onset due to the ability of Fe<sup>3+</sup> to oxidize dopamine to *ortho*-  
353 quinones that cause  $\alpha$ -syn monomers to aggregate.<sup>24,66,67</sup> Through *in vitro* experiments, we demonstrated  
354 that gut bacterial nitrate reduction can induce the cascade of oxidation reactions that ultimately results in  
355 dopamine-dependent  $\alpha$ -syn aggregation. This is the first report elucidating a gut bacterial metabolic  
356 pathway that directly influences  $\alpha$ -syn aggregation *in vitro*. If conserved in the mammalian GI tract, this  
357 biochemical pathway may be a novel target for intervention strategies to prevent  $\alpha$ -syn aggregation in  
358 the gut.

359 Due to tungstate's inhibition of *Enterobacteriaceae* nitrate respiration,<sup>19</sup> we sought to determine  
360 whether tungstate could be used to inhibit *Enterobacteriaceae*-induced  $\alpha$ -syn aggregation. Tungstate  
361 exposure limited dopamine oxidation and  $\alpha$ -syn aggregation in cultures of *E. coli* K-12 wild-type  
362 supplemented with nitrate. Additionally, tungstate treatment effectively lessened the oxidizing redox  
363 potential of the bacterial environment as well as increased the relative abundance of less-oxidizing Fe<sup>2+</sup>.  
364 Owing to the ability of oral tungstate treatment to effectively ameliorate murine colitis, which is  
365 exacerbated by gut bacterial nitrate respiration,<sup>19</sup> the ability of tungstate to limit  $\alpha$ -syn aggregation *in vitro*  
366 may have important therapeutic implications for limiting  $\alpha$ -syn aggregation in the mammalian intestine.

367 Towards determining the significance of bacterial nitrate respiration to  $\alpha$ -syn aggregation in the  
368 gut, we focused our efforts on EECs. EECs are emerging as a critical mediator of the gut-brain axis<sup>68,69</sup>  
369 and have been implicated in PD as a source of intestinal  $\alpha$ -syn.<sup>4,51</sup> Since EECs can form synapses with  
370 the enteric nervous system,<sup>68</sup> it has been hypothesized that  $\alpha$ -syn aggregates may spread from EECs to  
371 the brain via the vagus nerve;<sup>4,51</sup> however, the precise molecular stimuli of  $\alpha$ -syn aggregation in EECs  
372 have remained elusive. Owing to our findings that nitrite induces dopamine-dependent  $\alpha$ -syn aggregation  
373 *in vitro*, we suspected that nitrite could induce the same process in EECs. Within EECs, nitrite exposure

374 (0.5–50 mM) afforded a dose-dependent increase in the amount of  $\alpha$ -syn aggregation. Consistent with  
375 our *in vitro* experiments, the effect of nitrate (0.5 mM) on  $\alpha$ -syn aggregation was no different than sham  
376 treatment. Notably, the concentration of nitrate in the mucus layer of the intestinal lumen is on the order  
377 of 0.5 mM,<sup>18</sup> which supports the physiological relevance of our findings. We demonstrated that nitrite—  
378 the product of gut bacterial *Enterobacteriaceae* nitrate respiration that occurs within the GI tract<sup>18,19</sup>—can  
379 induce  $\alpha$ -syn aggregation in EECs, which line the GI lumen.

380 *Enterobacteriaceae* is more abundant in people with PD as compared to non-diseased, age-  
381 matched controls and is positively correlated with the severity of motor dysfunction;<sup>9</sup> however, whether  
382 *Enterobacteriaceae* plays a causative role in PD has remained unknown. Findings from our *in vitro*  
383 experiments that demonstrated the capacity of nitrite to induce  $\alpha$ -syn aggregation provided the foundation  
384 to test a causative role for bacterial nitrate respiration on  $\alpha$ -syn-dependent neurodegeneration *in vivo*  
385 using a *C. elegans* model of PD. Our results demonstrated that acute exposure of nematodes to *E. coli*  
386 K-12 wild-type that reduced nitrate to nitrite caused significant acceleration of dopaminergic  
387 neurodegeneration as compared to either treatment with cultures of *E. coli* K-12 wild-type without nitrate  
388 or to no bacterial treatment. While genetic knockout of nitrate respiration ( $\Delta moaA$ ) in *E. coli* K-12  
389 precluded this bacterium from inducing neurodegeneration, even in the presence of nitrate, exposing  
390 nematodes to the redox-active metabolic product of nitrate reduction, nitrite, recapitulated the  
391 dopaminergic neurodegenerative phenotype that was evoked by nitrate-reducing *E. coli* K-12. In addition  
392 to the significance of nitrite, the neurodegenerative phenotype depended on the presence of  $\alpha$ -syn's C-  
393 terminus residues (125–129) that interact with dopamine quinones to instigate  $\alpha$ -syn aggregate  
394 formation.<sup>62,63</sup> Mutation of these  $\alpha$ -syn residues [A53T(125-9m)] to preclude interactions between  $\alpha$ -syn  
395 and dopamine quinone abrogated neurodegeneration: neither exposure to nitrate-reducing bacteria nor  
396 nitrite could induce neurotoxicity beyond the levels observed in untreated controls. These findings  
397 suggest that acute exposure of *C. elegans* to the metabolic product of bacterial nitrate reduction induces  
398 the putative formation of dopamine-derived quinones that, upon interaction with the C-terminus of  $\alpha$ -syn,  
399 causes neurotoxic  $\alpha$ -syn aggregation.

400 In summary, our data demonstrate that the gut microbiota, in particular *E. coli* (a prototypic

401 organism of the *Enterobacteriaceae* bacterial family<sup>18</sup>), is capable of inducing  $\alpha$ -syn aggregation *in vitro*  
402 and  $\alpha$ -syn-associated neurodegeneration in a *C. elegans* model of PD. Here, we identified a specific  
403 metabolic pathway, bacterial nitrate reduction, that can generate the oxidative environment that causes  
404 dopamine oxidation and subsequent  $\alpha$ -syn aggregation. While dopamine oxidation has been identified  
405 as a crucial component of  $\alpha$ -syn aggregation mechanisms in the brain,<sup>24,66,67</sup> we have demonstrated that  
406 dopamine-dependent mechanisms of  $\alpha$ -syn aggregation are also likely relevant in the gut. Our findings  
407 that nitrite induced  $\alpha$ -syn aggregation in EECs provides strong motivation for examining these cells as a  
408 likely conduit of the gut–brain axis in PD. Future work will focus on the ability of  $\alpha$ -syn aggregates to  
409 spread to the enteric nervous system following their formation in EECs. Finally, our studies of *C. elegans*  
410 models of PD provide supporting evidence for the *in vivo* relevance of gut bacteria nitrate reduction to  $\alpha$ -  
411 syn aggregation and neurodegeneration. If the cascade of reactions initiated by bacterial nitrate reduction  
412 and ending with  $\alpha$ -syn aggregation is conserved in the mammalian gut, our findings position gut bacterial  
413 nitrate reduction as a novel target that may be leveraged for early intervention strategies to prevent  
414 intestinal  $\alpha$ -syn aggregation and limit Parkinsonian neurodegeneration.

415

## 416 **MATERIALS AND METHODS**

417 Full details for all materials and methods are provided in the Supplementary Materials.

418

## 419 **ASSOCIATED CONTENT**

420 **Supplementary Materials:** Materials and Methods; Figures S1-S6

421

## 422 **AUTHOR INFORMATION**

423 **Corresponding Author:** Elizabeth N. Bess, Departments of Chemistry and Molecular Biology &  
424 Biochemistry, University of California, Irvine, California, USA. E-mail: [elizabeth.bess@uci.edu](mailto:elizabeth.bess@uci.edu)

425

426 **Author Contributions:** L.O.O. and E.N.B. developed the project and performed data analysis. L.O.O.  
427 designed and performed experiments with contributions from K.S.U. L.O.O., K.S.U., and E.N.B provided



428 critical feedback on experiments. L.O.O. and E.N.B. wrote the manuscript. E.N.B. acquired funds and  
429 provided project supervision and administration. All authors read and approved the final version of the  
430 manuscript.

431

432 **Notes:** The authors declare no conflicts of interest. All authors read and approved the final version of the  
433 manuscript. Data generated or analyzed during this study are included in the manuscript and supporting  
434 files or are available from the corresponding author upon reasonable request.

435

#### 436 **ACKNOWLEDGMENTS**

437 We thank Professor Kimberlee Caldwell and Professor Guy Caldwell for kindly providing the *C. elegans*  
438 strains used in this study. The table of contents graphic was created with BioRender.com (agreement  
439 number DM240BYT0B). This work was supported by the University of California, Irvine School of Physical  
440 Sciences and the University of California Cancer Research Coordinating Committee (C21CR2124). This  
441 study was made possible in part through access to the Optical Biology Core Facility of the Developmental  
442 Biology Center, a shared resource supported by the Cancer Center Support Grant (CA-62203) and  
443 Center for Complex Biological Systems Support Grant (GM-076516) at the University of California, Irvine.

444

#### 445 **REFERENCES**

- 446 (1) Braak, H.; Rüb, U.; Gai, W. P.; Del Tredici, K. Idiopathic Parkinson's Disease: Possible Routes  
447 by Which Vulnerable Neuronal Types May Be Subject to Neuroinvasion by an Unknown  
448 Pathogen. *J. Neural Transm.* **2003**, *110* (5), 517–536.
- 449 (2) Borghammer, P.; Van Den Berge, N. Brain-First versus Gut-First Parkinson's Disease: A  
450 Hypothesis. *J. Parkinsons. Dis.* **2019**, *9* (s2), S281–S295.
- 451 (3) Spillantini, M. G.; Schmidt, M. L.; Lee, V. M.; Trojanowski, J. Q.; Jakes, R.; Goedert, M. Alpha-  
452 Synuclein in Lewy Bodies. *Nature* **1997**, *388* (6645), 839–840.
- 453 (4) Chandra, R.; Hiniker, A.; Kuo, Y.-M.; Nussbaum, R. L.; Liddle, R. A.  $\alpha$ -Synuclein in Gut  
454 Endocrine Cells and Its Implications for Parkinson's Disease. *JCI Insight* **2017**, *2* (12).

- 455 <https://doi.org/10.1172/jci.insight.92295>.
- 456 (5) Paillusson, S.; Clairembault, T.; Biraud, M.; Neunlist, M.; Derkinderen, P. Activity-Dependent  
457 Secretion of Alpha-Synuclein by Enteric Neurons. *J. Neurochem.* **2013**, *125* (4), 512–517.
- 458 (6) Hilton, D.; Stephens, M.; Kirk, L.; Edwards, P.; Potter, R.; Zajicek, J.; Broughton, E.; Hagan, H.;  
459 Carroll, C. Accumulation of  $\alpha$ -Synuclein in the Bowel of Patients in the Pre-Clinical Phase of  
460 Parkinson's Disease. *Acta Neuropathol.* **2014**, *127* (2), 235–241.
- 461 (7) Holmqvist, S.; Chutna, O.; Bousset, L.; Aldrin-Kirk, P.; Li, W.; Björklund, T.; Wang, Z.-Y.;  
462 Roybon, L.; Melki, R.; Li, J.-Y. Direct Evidence of Parkinson Pathology Spread from the  
463 Gastrointestinal Tract to the Brain in Rats. *Acta Neuropathol.* **2014**, *128* (6), 805–820.
- 464 (8) Challis, C.; Hori, A.; Sampson, T. R.; Yoo, B. B.; Challis, R. C.; Hamilton, A. M.; Mazmanian, S.  
465 K.; Volpicelli-Daley, L. A.; Gradinaru, V. Gut-Seeded  $\alpha$ -Synuclein Fibrils Promote Gut  
466 Dysfunction and Brain Pathology Specifically in Aged Mice. *Nat. Neurosci.* **2020**, *23* (3), 327–  
467 336.
- 468 (9) Scheperjans, F.; Aho, V.; Pereira, P. A. B.; Koskinen, K.; Paulin, L.; Pekkonen, E.; Haapaniemi,  
469 E.; Kaakkola, S.; Eerola-Rautio, J.; Pohja, M.; Kinnunen, E.; Murros, K.; Auvinen, P. Gut  
470 Microbiota Are Related to Parkinson's Disease and Clinical Phenotype. *Mov. Disord.* **2015**, *30*  
471 (3), 350–358.
- 472 (10) Sun, M.-F.; Shen, Y.-Q. Dysbiosis of Gut Microbiota and Microbial Metabolites in Parkinson's  
473 Disease. *Ageing Res. Rev.* **2018**, *45*, 53–61.
- 474 (11) Romano, S.; Savva, G. M.; Bedarf, J. R.; Charles, I. G.; Hildebrand, F.; Naredo, A. Meta-Analysis  
475 of the Parkinson's Disease Gut Microbiome Suggests Alterations Linked to Intestinal  
476 Inflammation. *npj Parkinson's Disease.* 2021. <https://doi.org/10.1038/s41531-021-00156-z>.
- 477 (12) Keshavarzian, A.; Green, S. J.; Engen, P. A.; Voigt, R. M.; Naqib, A.; Forsyth, C. B.; Mutlu, E.;  
478 Shannon, K. M. Colonic Bacterial Composition in Parkinson's Disease. *Mov. Disord.* **2015**, *30*  
479 (10), 1351–1360.
- 480 (13) Li, C.; Cui, L.; Yang, Y.; Miao, J.; Zhao, X.; Zhang, J.; Cui, G.; Zhang, Y. Gut Microbiota Differs  
481 Between Parkinson's Disease Patients and Healthy Controls in Northeast China. *Front. Mol.*

- 482 *Neurosci.* **2019**, *12*, 171.
- 483 (14) Li, W.; Wu, X.; Hu, X.; Wang, T.; Liang, S.; Duan, Y.; Jin, F.; Qin, B. Structural Changes of Gut  
484 Microbiota in Parkinson's Disease and Its Correlation with Clinical Features. *Sci. China Life Sci.*  
485 **2017**, *60* (11), 1223–1233.
- 486 (15) Zhang, F.; Yue, L.; Fang, X.; Wang, G.; Li, C.; Sun, X.; Jia, X.; Yang, J.; Song, J.; Zhang, Y.;  
487 Guo, C.; Ma, G.; Sang, M.; Chen, F.; Wang, P. Altered Gut Microbiota in Parkinson's Disease  
488 Patients/healthy Spouses and Its Association with Clinical Features. *Parkinsonism Relat. Disord.*  
489 **2020**, *81*, 84–88.
- 490 (16) Unger, M. M.; Spiegel, J.; Dillmann, K.-U.; Grundmann, D.; Philippeit, H.; Bürmann, J.;  
491 Faßbender, K.; Schwiertz, A.; Schäfer, K.-H. Short Chain Fatty Acids and Gut Microbiota Differ  
492 between Patients with Parkinson's Disease and Age-Matched Controls. *Parkinsonism Relat.*  
493 *Disord.* **2016**, *32*, 66–72.
- 494 (17) Sampson, T. R.; Debelius, J. W.; Thron, T.; Janssen, S.; Shastri, G. G.; Ilhan, Z. E.; Challis, C.;  
495 Schretter, C. E.; Rocha, S.; Gradinaru, V.; Chesselet, M.-F.; Keshavarzian, A.; Shannon, K. M.;  
496 Krajmalnik-Brown, R.; Wittung-Stafshede, P.; Knight, R.; Mazmanian, S. K. Gut Microbiota  
497 Regulate Motor Deficits and Neuroinflammation in a Model of Parkinson's Disease. *Cell* **2016**,  
498 *167* (6), 1469–1480.e12.
- 499 (18) Winter, S. E.; Winter, M. G.; Xavier, M. N.; Thiennimitr, P.; Poon, V.; Keestra, A. M.; Laughlin, R.  
500 C.; Gomez, G.; Wu, J.; Lawhon, S. D.; Popova, I. E.; Parikh, S. J.; Adams, L. G.; Tsohis, R. M.;  
501 Stewart, V. J.; Bäumlner, A. J. Host-Derived Nitrate Boosts Growth of *E. Coli* in the Inflamed Gut.  
502 *Science* **2013**, *339* (6120), 708–711.
- 503 (19) Zhu, W.; Winter, M. G.; Byndloss, M. X.; Spiga, L.; Duerkop, B. A.; Hughes, E. R.; Büttner, L.; de  
504 Lima Romão, E.; Behrendt, C. L.; Lopez, C. A.; Sifuentes-Dominguez, L.; Huff-Hardy, K.; Wilson,  
505 R. P.; Gillis, C. C.; Tükel, Ç.; Koh, A. Y.; Burstein, E.; Hooper, L. V.; Bäumlner, A. J.; Winter, S. E.  
506 Precision Editing of the Gut Microbiota Ameliorates Colitis. *Nature* **2018**, *553* (7687), 208–211.
- 507 (20) Kishimoto, Y.; Zhu, W.; Hosoda, W.; Sen, J. M.; Mattson, M. P. Chronic Mild Gut Inflammation  
508 Accelerates Brain Neuropathology and Motor Dysfunction in  $\alpha$ -Synuclein Mutant Mice.

- 509 *Neuromolecular Med.* **2019**, *21* (3), 239–249.
- 510 (21) Grathwohl, S.; Quansah, E.; Maroof, N.; Steiner, J. A.; Spycher, L.; Benmansour, F.; Duran-  
511 Pacheco, G.; Siebourg-Polster, J.; Oroszlan-Szovik, K.; Remy, H.; Haenggi, M.; Stawiski, M.;  
512 Selhausen, M.; Maliver, P.; Wolfert, A.; Emrich, T.; Madaj, Z.; Su, A.; Escobar Galvis, M. L.;  
513 Mueller, C.; Herrmann, A.; Brundin, P.; Britschgi, M. Specific Immune Modulation of  
514 Experimental Colitis Drives Enteric Alpha-Synuclein Accumulation and Triggers Age-Related  
515 Parkinson-like Brain Pathology. <https://doi.org/10.21203/rs.3.rs-100199/v1>.
- 516 (22) Hare, D. J.; Double, K. L. Iron and Dopamine: A Toxic Couple. *Brain* **2016**, *139* (Pt 4), 1026–  
517 1035.
- 518 (23) Conway, K. A.; Rochet, J. C.; Bieganski, R. M.; Lansbury, P. T., Jr. Kinetic Stabilization of the  
519 Alpha-Synuclein Protofibril by a Dopamine-Alpha-Synuclein Adduct. *Science* **2001**, *294* (5545),  
520 1346–1349.
- 521 (24) Bisaglia, M.; Mammi, S.; Bubacco, L. Kinetic and Structural Analysis of the Early Oxidation  
522 Products of Dopamine Analysis of the Interactions with  $\alpha$ -Synuclein. *J. Biol. Chem.* **2007**, *282*  
523 (21), 15597–15605.
- 524 (25) Eisenhofer, G.; Aneman, A.; Friberg, P.; Hooper, D.; Fändriks, L.; Lonroth, H.; Hunyady, B.;  
525 Mezey, E. Substantial Production of Dopamine in the Human Gastrointestinal Tract. *J. Clin.*  
526 *Endocrinol. Metab.* **1997**, *82* (11), 3864–3871.
- 527 (26) Asano, Y.; Hiramoto, T.; Nishino, R.; Aiba, Y.; Kimura, T.; Yoshihara, K.; Koga, Y.; Sudo, N.  
528 Critical Role of Gut Microbiota in the Production of Biologically Active, Free Catecholamines in  
529 the Gut Lumen of Mice. *Am. J. Physiol. Gastrointest. Liver Physiol.* **2012**, *303* (11), G1288–  
530 G1295.
- 531 (27) Lund, E. K.; Wharf, S. G.; Fairweather-Tait, S. J.; Johnson, I. T. Increases in the Concentrations  
532 of Available Iron in Response to Dietary Iron Supplementation Are Associated with Changes in  
533 Crypt Cell Proliferation in Rat Large Intestine. *J. Nutr.* **1998**, *128* (2), 175–179.
- 534 (28) Lv, H.; Shang, P. The Significance, Trafficking and Determination of Labile Iron in Cytosol,  
535 Mitochondria and Lysosomes. *Metallomics* **2018**, *10* (7), 899–916.

- 536 (29) Radi, R. Oxygen Radicals, Nitric Oxide, and Peroxynitrite: Redox Pathways in Molecular  
537 Medicine. *Proc. Natl. Acad. Sci. U. S. A.* **2018**, *115* (23), 5839–5848.
- 538 (30) Singer, I. I.; Kawka, D. W.; Scott, S.; Weidner, J. R.; Mumford, R. A.; Riehl, T. E.; Stenson, W. F.  
539 Expression of Inducible Nitric Oxide Synthase and Nitrotyrosine in Colonic Epithelium in  
540 Inflammatory Bowel Disease. *Gastroenterology* **1996**, *111* (4), 871–885.
- 541 (31) Schöneich, C. Methionine Oxidation by Reactive Oxygen Species: Reaction Mechanisms and  
542 Relevance to Alzheimer's Disease. *Biochim. Biophys. Acta* **2005**, *1703* (2), 111–119.
- 543 (32) Balagam, B.; Richardson, D. E. The Mechanism of Carbon Dioxide Catalysis in the Hydrogen  
544 Peroxide N-Oxidation of Amines. *Inorg. Chem.* **2008**, *47* (3), 1173–1178.
- 545 (33) Circu, M. L.; Aw, T. Y. Redox Biology of the Intestine. *Free Radic. Res.* **2011**, *45* (11-12), 1245–  
546 1266.
- 547 (34) Reese, A. T.; Cho, E. H.; Klitzman, B.; Nichols, S. P.; Wisniewski, N. A.; Villa, M. M.; Durand, H.  
548 K.; Jiang, S.; Midani, F. S.; Nimmagadda, S. N.; O'Connell, T. M.; Wright, J. P.; Deshusses, M.  
549 A.; David, L. A. Antibiotic-Induced Changes in the Microbiota Disrupt Redox Dynamics in the  
550 Gut. *Elife* **2018**, *7*. <https://doi.org/10.7554/eLife.35987>.
- 551 (35) Berg, B. L.; Stewart, V. Structural Genes for Nitrate-Inducible Formate Dehydrogenase in  
552 *Escherichia Coli* K-12. *Genetics* **1990**, *125* (4), 691–702.
- 553 (36) Parham, N. J.; Gibson, G. R. Microbes Involved in Dissimilatory Nitrate Reduction in the Human  
554 Large Intestine. *FEMS Microbiol. Ecol.* **2000**, *31* (1), 21–28.
- 555 (37) Bonnefoy, V.; Demoss, J. A. Nitrate Reductases in *Escherichia Coli*. *Antonie Van Leeuwenhoek*  
556 **1994**, *66* (1-3), 47–56.
- 557 (38) Tiso, M.; Schechter, A. N. Nitrate Reduction to Nitrite, Nitric Oxide and Ammonia by Gut Bacteria  
558 under Physiological Conditions. *PLoS One* **2015**, *10* (3), e0119712.
- 559 (39) Kortman, G. A.; Raffatellu, M.; Swinkels, D. W.; Tjalsma, H. Nutritional Iron Turned inside out:  
560 Intestinal Stress from a Gut Microbial Perspective. *FEMS Microbiol. Rev.* **2014**, *38* (6), 1202–  
561 1234.
- 562 (40) Eckburg, P. B.; Bik, E. M.; Bernstein, C. N.; Purdom, E.; Dethlefsen, L.; Sargent, M.; Gill, S. R.;

- 563 Nelson, K. E.; Relman, D. A. Diversity of the Human Intestinal Microbial Flora. *Science* **2005**,  
564 *308* (5728), 1635–1638.
- 565 (41) Liu, C.-G.; Qin, J.-C.; Lin, Y.-H. Fermentation and Redox Potential. In *Fermentation Processes*;  
566 Jozala, A. F., Ed.; IntechOpen: Rijeka, 2017.
- 567 (42) Jeitner, T. M. Optimized Ferrozine-Based Assay for Dissolved Iron. *Anal. Biochem.* **2014**, *454*,  
568 36–37.
- 569 (43) Sun, Y.; Pham, A. N.; Waite, T. D. Elucidation of the Interplay between Fe(II), Fe(III), and  
570 Dopamine with Relevance to Iron Solubilization and Reactive Oxygen Species Generation by  
571 Catecholamines. *J. Neurochem.* **2016**, *137* (6), 955–968.
- 572 (44) Abeyawardhane, D. L.; Lucas, H. R. Iron Redox Chemistry and Implications in the Parkinson's  
573 Disease Brain. *Oxid. Med. Cell. Longev.* **2019**, *2019*, 4609702.
- 574 (45) Zucca, F. A.; Segura-Aguilar, J.; Ferrari, E.; Muñoz, P.; Paris, I.; Sulzer, D.; Sarna, T.; Casella,  
575 L.; Zecca, L. Interactions of Iron, Dopamine and Neuromelanin Pathways in Brain Aging and  
576 Parkinson's Disease. *Prog. Neurobiol.* **2017**, *155*, 96–119.
- 577 (46) Munoz, P.; Huenchuguala, S.; Paris, I.; Segura-Aguilar, J. Dopamine Oxidation and Autophagy.  
578 *Parkinson's disease* **2012**, *2012*.
- 579 (47) Paz, M. A.; Flückiger, R.; Boak, A.; Kagan, H. M.; Gallop, P. M. Specific Detection of  
580 Quinoproteins by Redox-Cycling Staining. *J. Biol. Chem.* **1991**, *266* (2), 689–692.
- 581 (48) Rothery, R. A.; Magalon, A.; Giordano, G.; Guigliarelli, B.; Blasco, F.; Weiner, J. H. The  
582 Molybdenum Cofactor of Escherichia Coli Nitrate Reductase A (NarGHI). Effect of a mobAB  
583 Mutation and Interactions with [Fe-S] Clusters. *J. Biol. Chem.* **1998**, *273* (13), 7462–7469.
- 584 (49) Habowski, A. N.; Bates, J. M.; Flesher, J. L.; Edwards, R. A.; Waterman, M. L. Isolation of Murine  
585 Large Intestinal Crypt Cell Populations with Flow Sorting. *Research Square*, 2020.  
586 <https://doi.org/10.21203/rs.3.pex-994/v1>.
- 587 (50) Bohórquez, D. V.; Shahid, R. A.; Erdmann, A.; Kreger, A. M.; Wang, Y.; Calakos, N.; Wang, F.;  
588 Liddle, R. A. Neuroepithelial Circuit Formed by Innervation of Sensory Enteroendocrine Cells. *J.*  
589 *Clin. Invest.* **2015**, *125* (2), 782–786.

- 590 (51) Amorim Neto, D. P.; Bosque, B. P.; Pereira de Godoy, J. V.; Rodrigues, P. V.; Meneses, D. D.;  
591 Tostes, K.; Costa Tonoli, C. C.; Faustino de Carvalho, H.; González-Billault, C.; de Castro  
592 Fonseca, M. Akkermansia Muciniphila Induces Mitochondrial Calcium Overload and  $\alpha$ -Synuclein  
593 Aggregation in an Enteroendocrine Cell Line. *iScience* **2022**, *25* (3), 103908.
- 594 (52) Roediger, W. E.; Radcliffe, B. C. Role of Nitrite and Nitrate as a Redox Couple in the Rat Colon.  
595 Implications for Diarrheal Conditions. *Gastroenterology* **1988**, *94* (4), 915–922.
- 596 (53) McCarthy, T.; Green, B. D.; Calderwood, D.; Gillespie, A.; Cryan, J. F.; Giblin, L. STC-1 Cells. In  
597 *The Impact of Food Bioactives on Health: in vitro and ex vivo models*; Verhoeckx, K., Cotter, P.,  
598 López-Expósito, I., Kleiveland, C., Lea, T., Mackie, A., Requena, T., Swiatecka, D., Wichers, H.,  
599 Eds.; Springer International Publishing: Cham, 2015; pp 211–220.
- 600 (54) Ortiz de Ora, L.; Bess, E. N. Emergence of Caenorhabditis Elegans as a Model Organism for  
601 Dissecting the Gut-Brain Axis. *mSystems* **2021**, *6* (4), e0075521.
- 602 (55) Mor, D. E.; Tsika, E.; Mazzulli, J. R.; Gould, N. S.; Kim, H.; Daniels, M. J.; Doshi, S.; Gupta, P.;  
603 Grossman, J. L.; Tan, V. X.; Kalb, R. G.; Caldwell, K. A.; Caldwell, G. A.; Wolfe, J. H.;  
604 Ischiropoulos, H. Dopamine Induces Soluble  $\alpha$ -Synuclein Oligomers and Nigrostriatal  
605 Degeneration. *Nat. Neurosci.* **2017**, *20* (11), 1560–1568.
- 606 (56) Chen, K. S.; Menezes, K.; Rodgers, J. B.; O'Hara, D. M.; Tran, N.; Fujisawa, K.; Ishikura, S.;  
607 Khodaei, S.; Chau, H.; Cranston, A.; Kapadia, M.; Pawar, G.; Ping, S.; Krizus, A.; Lacoste, A.;  
608 Spangler, S.; Visanji, N. P.; Marras, C.; Majbour, N. K.; El-Agnaf, O. M. A.; Lozano, A. M.;  
609 Culotti, J.; Suo, S.; Ryu, W. S.; Kalia, S. K.; Kalia, L. V. Small Molecule Inhibitors of  $\alpha$ -Synuclein  
610 Oligomers Identified by Targeting Early Dopamine-Mediated Motor Impairment in C. Elegans.  
611 *Mol. Neurodegener.* **2021**, *16* (1), 77.
- 612 (57) Kuwahara, T.; Koyama, A.; Gengyo-Ando, K.; Masuda, M.; Kowa, H.; Tsunoda, M.; Mitani, S.;  
613 Iwatsubo, T. Familial Parkinson Mutant  $\alpha$ -Synuclein Causes Dopamine Neuron Dysfunction in  
614 Transgenic Caenorhabditis Elegans. *J. Biol. Chem.* **2006**, *281* (1), 334–340.
- 615 (58) Tucci, M. L.; Harrington, A. J.; Caldwell, G. A.; Caldwell, K. A. Modeling Dopamine Neuron  
616 Degeneration in Caenorhabditis Elegans. *Methods Mol. Biol.* **2011**, *793*, 129–148.

- 617 (59) Benedetto, A.; Au, C.; Avila, D. S.; Milatovic, D.; Aschner, M. Extracellular Dopamine Potentiates  
618 Mn-Induced Oxidative Stress, Lifespan Reduction, and Dopaminergic Neurodegeneration in a  
619 BLI-3-Dependent Manner in *Caenorhabditis Elegans*. *PLoS Genet.* **2010**, *6* (8), e1001084.
- 620 (60) Berkowitz, L. A.; Hamamichi, S.; Knight, A. L.; Harrington, A. J.; Caldwell, G. A.; Caldwell, K. A.  
621 Application of a *C. Elegans* Dopamine Neuron Degeneration Assay for the Validation of Potential  
622 Parkinson's Disease Genes. *J. Vis. Exp.* **2008**, No. 17. <https://doi.org/10.3791/835>.
- 623 (61) Hamamichi, S.; Rivas, R. N.; Knight, A. L.; Cao, S.; Caldwell, K. A.; Caldwell, G. A. Hypothesis-  
624 Based RNAi Screening Identifies Neuroprotective Genes in a Parkinson's Disease Model. *Proc.*  
625 *Natl. Acad. Sci. U. S. A.* **2008**, *105* (2), 728–733.
- 626 (62) Norris, E. H.; Giasson, B. I.; Hodara, R.; Xu, S. Reversible Inhibition of  $\alpha$ -Synuclein Fibrillization  
627 by Dopaminochrome-Mediated Conformational Alterations. *Journal of Biological* **2005**.
- 628 (63) Mazzulli, J. R.; Armakola, M.; Dumoulin, M.; Parastatidis, I.; Ischiropoulos, H. Cellular  
629 Oligomerization of  $\alpha$ -Synuclein Is Determined by the Interaction of Oxidized Catechols with a C-  
630 Terminal Sequence. *J. Biol. Chem.* **2007**, *282* (43), 31621–31630.
- 631 (64) Friedman, E. S.; Bittinger, K.; Esipova, T. V.; Hou, L.; Chau, L.; Jiang, J.; Mesaros, C.; Lund, P.  
632 J.; Liang, X.; FitzGerald, G. A.; Goulian, M.; Lee, D.; Garcia, B. A.; Blair, I. A.; Vinogradov, S. A.;  
633 Wu, G. D. Microbes vs. Chemistry in the Origin of the Anaerobic Gut Lumen. *Proc. Natl. Acad.*  
634 *Sci. U. S. A.* **2018**, *115* (16), 4170–4175.
- 635 (65) Radi, R. Oxygen Radicals, Nitric Oxide, and Peroxynitrite: Redox Pathways in Molecular  
636 Medicine. *Proc. Natl. Acad. Sci. U. S. A.* **2018**, *115* (23), 5839–5848.
- 637 (66) Conway, K. A.; Rochet, J. C.; Bieganski, R. M.; Lansbury, P. T., Jr. Kinetic Stabilization of the  
638 Alpha-Synuclein Protofibril by a Dopamine-Alpha-Synuclein Adduct. *Science* **2001**, *294* (5545),  
639 1346–1349.
- 640 (67) Bisaglia, M.; Tosatto, L.; Munari, F.; Tessari, I.; de Laureto, P. P.; Mammi, S.; Bubacco, L.  
641 Dopamine Quinones Interact with Alpha-Synuclein to Form Unstructured Adducts. *Biochem.*  
642 *Biophys. Res. Commun.* **2010**, *394* (2), 424–428.
- 643 (68) Kaelberer, M. M.; Buchanan, K. L.; Klein, M. E.; Barth, B. B.; Montoya, M. M.; Shen, X.;



644 Bohórquez, D. V. A Gut-Brain Neural Circuit for Nutrient Sensory Transduction. *Science* **2018**,  
645 361 (6408). <https://doi.org/10.1126/science.aat5236>.  
646 (69) Ye, L.; Bae, M.; Cassilly, C. D.; Jabba, S. V.; Thorpe, D. W.; Martin, A. M.; Lu, H.-Y.; Wang, J.;  
647 Thompson, J. D.; Lickwar, C. R.; Poss, K. D.; Keating, D. J.; Jordt, S.-E.; Clardy, J.; Liddle, R. A.;  
648 Rawls, J. F. Enteroendocrine Cells Sense Bacterial Tryptophan Catabolites to Activate Enteric  
649 and Vagal Neuronal Pathways. *Cell Host Microbe* **2021**, 29 (2), 179–196.e9.

650

651

652

653

654

655

656

657

658

659

660

661

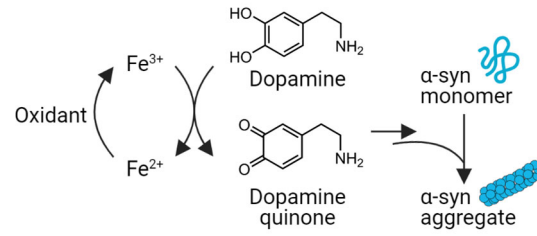

662

663 **Figure 1.** Upon oxidation of Fe<sup>2+</sup> to Fe<sup>3+</sup> in brain dopaminergic neurons, dopamine can be oxidized to  
664 *ortho*-quinones that cause  $\alpha$ -syn to misfold and aggregate.

665

666

667

668

669

670

671

672

673

674

675

676

677

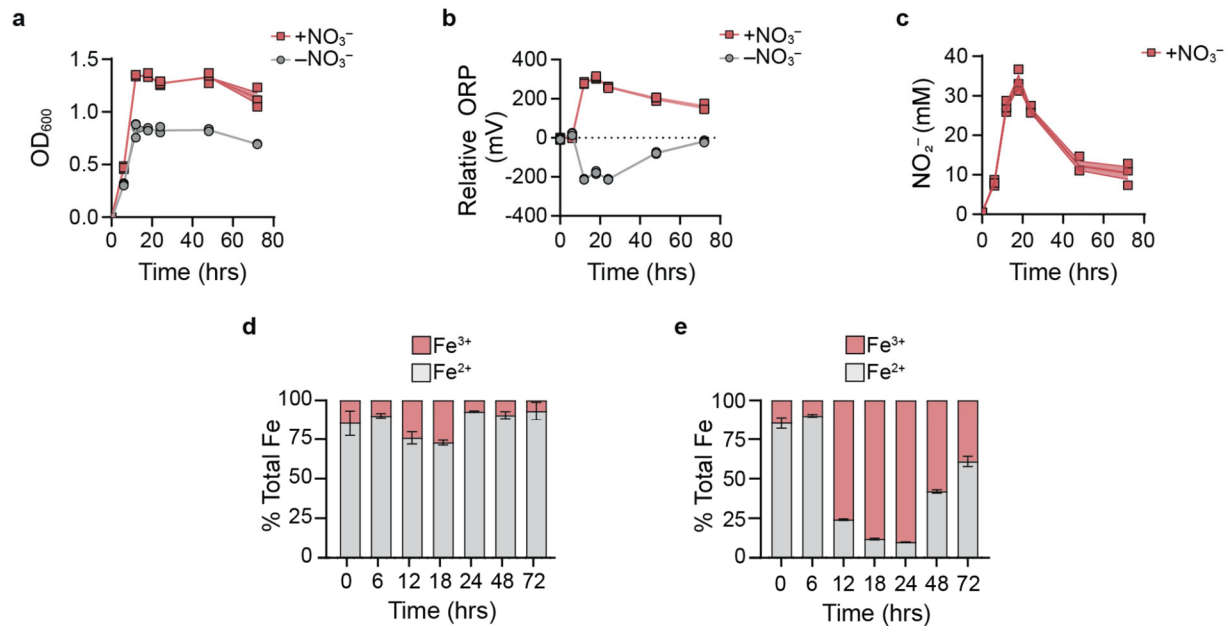

678

679 **Figure 2.** *E. coli* nitrate reduction generates an oxidant, nitrite, that creates an oxidizing redox potential  
680 in the bacterial environment and increases the relative abundance of  $Fe^{3+}$ . *E. coli* K-12 was incubated in  
681 mineral media with nitrate ( $mM9_{+NO_3}$ ) or without ( $mM9_{-NO_3}$ ). (a) Growth was measured by optical density  
682 at 600 nm ( $OD_{600}$ ). (b) Oxidation-reduction potential (ORP) of bacterial cultures was measured, using an  
683 electrode, in culture media relative sterile media. (c) Nitrite was quantified in cultures supplied with nitrate  
684 using the Griess assay. (d–e) Iron speciation was measured using the ferrozine assay in bacterial cultures  
685 where (d) media lacked nitrate ( $mM9_{-NO_3}$ ) or (e) media was supplemented with nitrate ( $mM9_{+NO_3}$ ).  $n = 3$   
686 biological replicates; bars denote means  $\pm$  S.E.M.

687

688

689

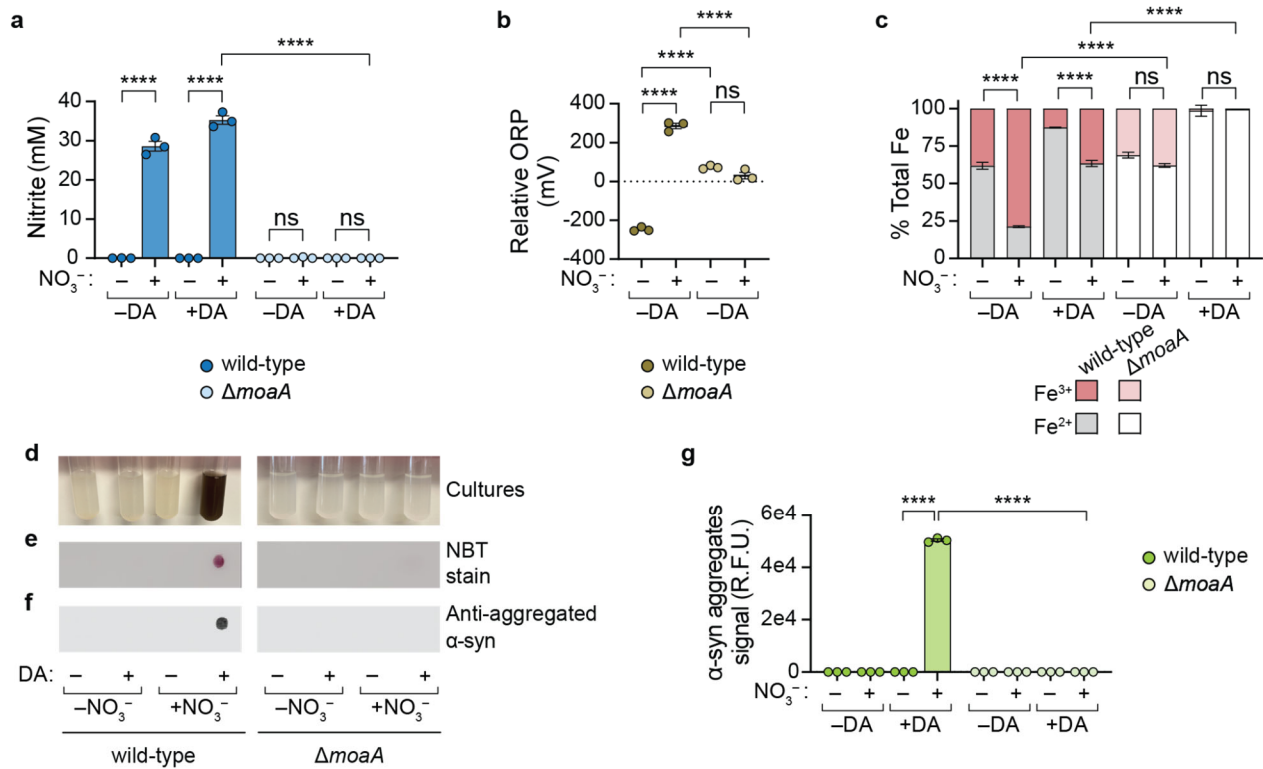

690  
691

692 **Figure 3.** *E. coli* nitrate respiration instigates dopamine-dependent quinone formation and  $\alpha$ -syn  
693 aggregation. *E. coli* K-12 wild-type or  $\Delta moaA$  was cultured for 14 hours in mM9 media with  $\alpha$ -syn  
694 monomer in the presence of nitrate (+NO<sub>3</sub>) or its absence (-NO<sub>3</sub>) and with dopamine (+DA) or without (-  
695 DA). Quantification of (a) nitrite (using Griess assay), (b) oxidation-reduction potential (ORP) relative to  
696 sterile media (using redox electrode), and (c) labile Fe<sup>3+</sup> and Fe<sup>2+</sup> (using ferrozine assay). (d-f)  
697 Representative images of (d) bacterial cultures as well as (e) membranes stained quinone formation  
698 (using nitroblue tetrazolium (NBT) stain) or (f) dot blots stained for  $\alpha$ -syn aggregate formation (using  
699 immunostaining with anti-fibril  $\alpha$ -synuclein as the primary antibody). (g) Quantification of  $\alpha$ -syn  
700 aggregates in dot blots. R.F.U.: relative fluorescence units. n = 3 biological replicates; bars denote means  
701  $\pm$  S.E.M.; significance was determined using ordinary one-way ANOVA with Sidak's multiple comparisons  
702 test; \*\*\*\*:  $P < 0.0001$ , ns: not significant.

703

704

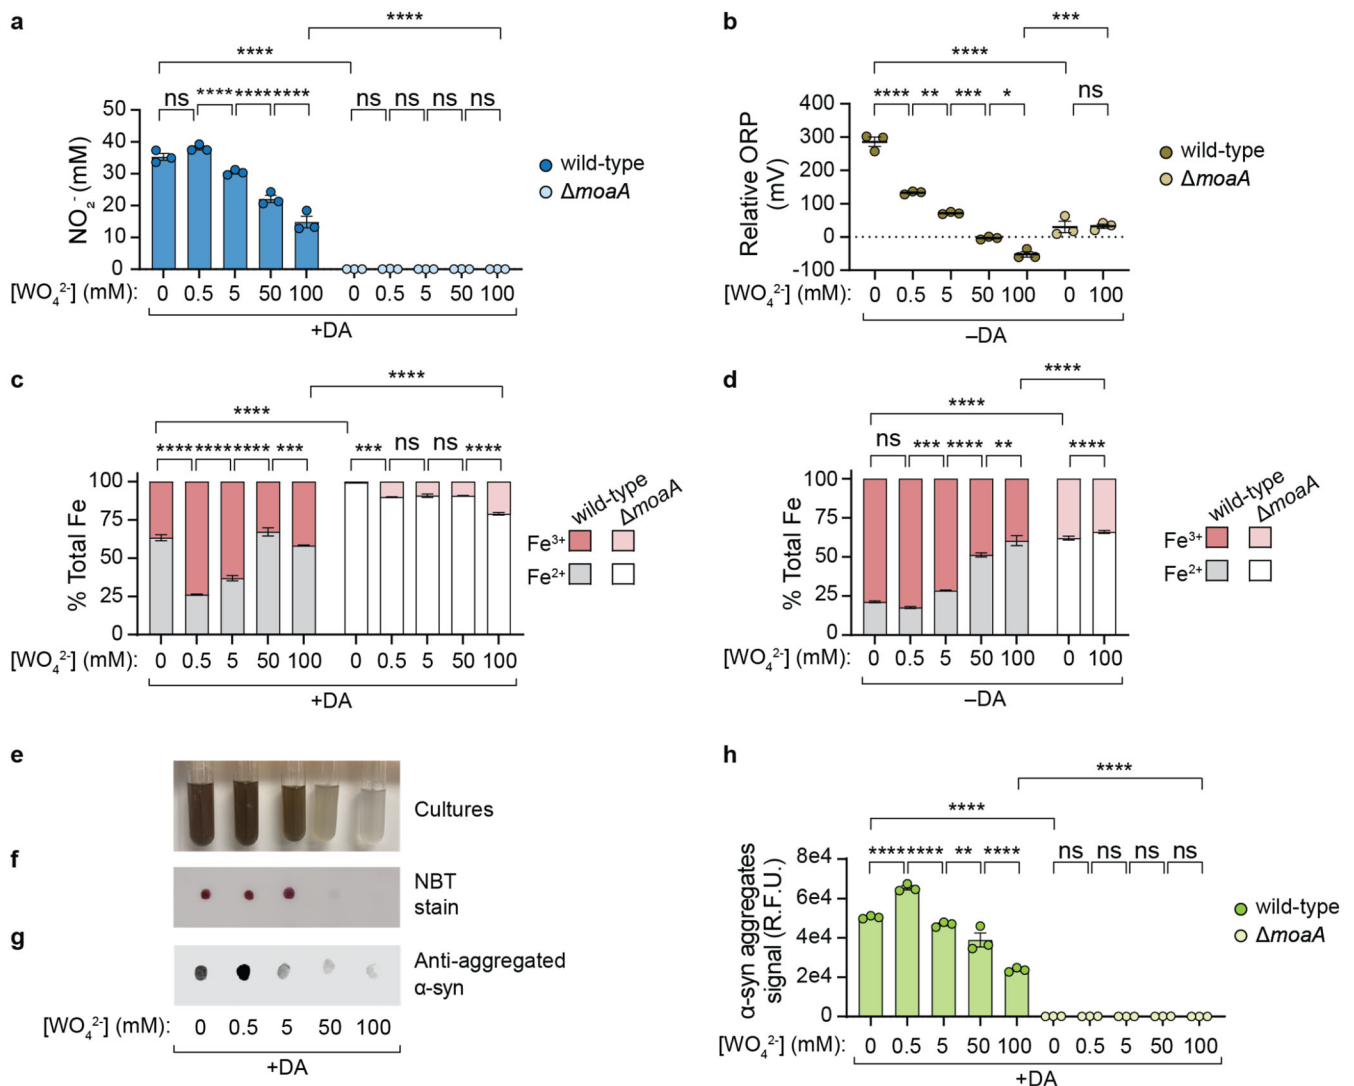

705

706 **Figure 4.** Tungstate limits α-syn aggregation by inhibiting bacterial nitrate reduction, which reduces redox  
 707 potential of the bacterial environment. *E. coli* K-12 wild-type or ΔmoaA was cultured for 14 hours in mM9  
 708 media with α-syn monomer in the presence of nitrate (+NO<sub>3</sub>), with dopamine (+DA) or without (-DA), and  
 709 with sodium tungstate (WO<sub>4</sub><sup>2-</sup>) at varying concentrations (0–100 mM). Quantification of (a) nitrite (using  
 710 Griess assay), (b) oxidation-reduction potential (ORP) relative to sterile media (using redox electrode),  
 711 and (c–d) labile Fe<sup>3+</sup> and Fe<sup>2+</sup> (using ferrozine assay) in cultures (c) with dopamine or (d) without  
 712 dopamine. (e–g) Representative images of (e) bacterial cultures of *E. coli* K-12 wild-type incubated in  
 713 mM9<sub>+NO<sub>3</sub>,+DA</sub> supplemented with tungstate (0–100 mM) as well as (f) membranes stained for quinone  
 714 formation (using nitroblue tetrazolium (NBT) stain) or (g) dot blots stained for α-syn aggregate formation  
 715 (using immunostaining with anti-fibril α-synuclein as the primary antibody). (h) Quantification of α-syn  
 716 aggregates in dot blots. R.F.U.: relative fluorescence units. n = 3 biological replicates; bars denote means  
 717 ± S.E.M.; significance was determined using ordinary one-way ANOVA with Sidak's multiple comparisons  
 718 test; \*\*\*\*: P < 0.0001, \*\*\*: P < 0.0007, \*\*: P < 0.0026, \*: P = 0.0168, ns: not significant.

719

720

721

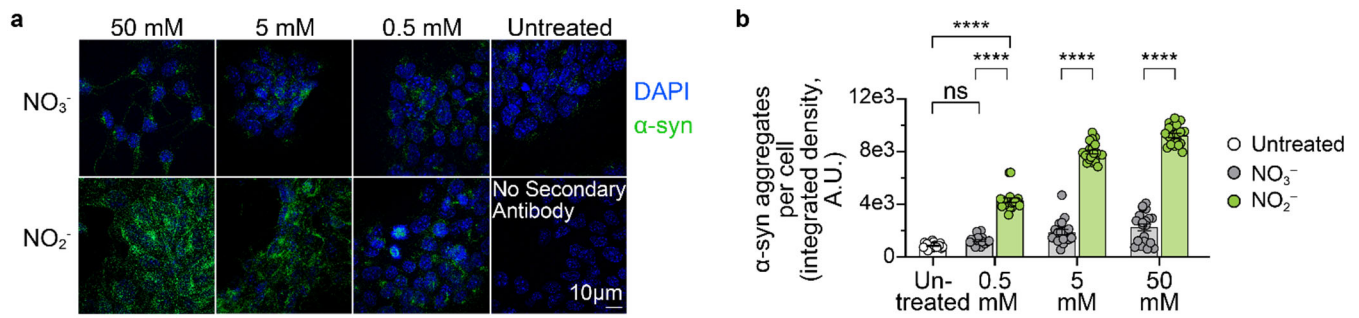

722

723 **Figure 5.** Nitrite, but not nitrate, induces  $\alpha$ -syn aggregation in enteroendocrine STC-1 cells.  $\alpha$ -syn  
724 aggregates per STC-1 cell upon incubation with nitrate ( $\text{NO}_3^-$ ) or nitrite ( $\text{NO}_2^-$ ) were (a) visualized  
725 (representative images) and (b) quantified using maximum intensity projections acquired by structured  
726 illumination microscopy (immunofluorescence staining of  $\alpha$ -syn aggregates is in green; DAPI-stained cell  
727 nuclei are in blue).  $n = 20$  cells; bars denote mean  $\pm$  S.E.M.; significance determined by one-way ANOVA  
728 with Sidak's multiple comparisons test; \*\*\*\*:  $P < 0.0001$ , ns: not significant.

729

730

731

732

733

734

735

736

737

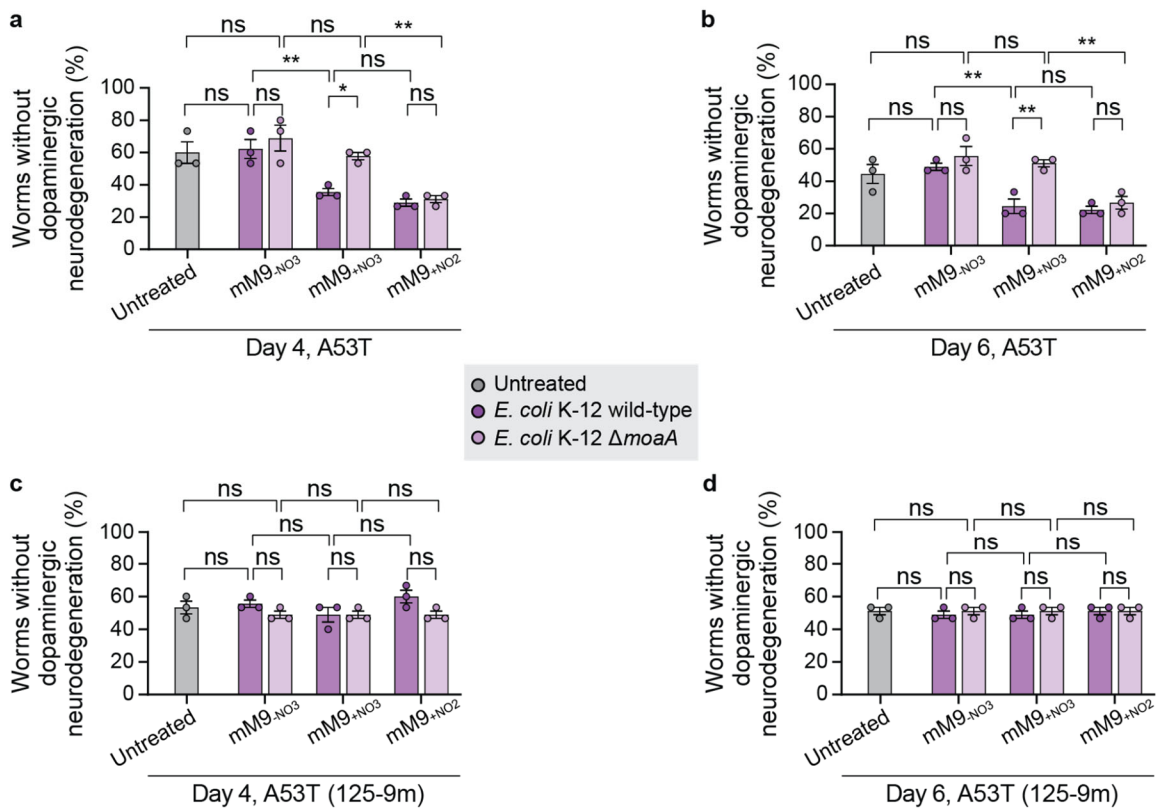

738

739

740

741

742

743

744

745

746

747

748

749

750

**Figure 6.** *E. coli* K-12 nitrate reduction induces dopaminergic neurodegeneration in *C. elegans* models of PD. Assessment of dopaminergic neurodegenerative phenotypes in *C. elegans* (a–b) strain UA287 (which expresses human  $\alpha$ -syn A53T) and (c–d) strain UA288 (which expresses human  $\alpha$ -syn A53T(125-9m)) following acute (three-hour) exposure to *E. coli* K-12 wild-type or  $\Delta moaA$  cultured in mM9 media without nitrate (mM9-NO<sub>3</sub>) or mM9 media supplemented with nitrate (mM9+NO<sub>3</sub>) or nitrite (mM9+NO<sub>2</sub>). Acute bacterial exposure was performed under anaerobic conditions at 48 hours post-hatching. Neurodegenerative phenotypes were detected using fluorescence microscopy at (a,c) day 4 and (b,d) day 6 post-hatching. n = 45 nematodes; values are averages of 15 worms from each of three independent transgenic worm lines per genetic background; bars denote means  $\pm$  S.E.M.; significance determined by one-way ANOVA with Sidak's multiple comparisons test; \*:  $P = 0.0102$ , \*\*:  $P < 0.0039$ , ns: not significant.
